# Supplementary material for: Sensitivity of Aeolus HLOS winds to temperature and pressurespecification in the L2B processor
Source: Copernicus journal article supplement (doi:10.5194/amt-2021-38), 2021-02-15
Supplement: Supplementary file [file amt-2021-38-AC1-supplement.pdf]

## **Response to Referee Comment (RC1) on “Sensitivity of Aeolus HLOS winds to temperature and pressure specification in the L2B processor”**

We are grateful for all the comments and suggestions. We believe that they led to several improvements in the revised text by a better description of the configuration errors and underlying limitations and also by providing a better flow of the information and the study results.

### **General Comment:**

*This study examines the sensitivity of retrieved HLOS Rayleigh winds to temperature and pressure fields that should be provided to the Aeolus L2B processor for the Rayleigh-Brillouin correction. The sensitivity to Mie-contamination correction is also assessed. The difference between IFS and ARPEGE short-range forecasts are used to estimate the uncertainties in temperature and pressure fields. These differences are likely to be smaller than real temperature and pressure short-range forecast errors because the IFS and ARPEGE forecast systems are based on the same NWP model and their forecasts rely on the same observing networks. Hence, it is not surprising that the differences found in this study are generally small and lead to L2B HLOS wind variations less than 0.15 m/s in 99% of cases. Although using differences between short-range forecasts from two NWP models as a proxy for the temperature and pressure errors is questionable, there is no obvious and valuable alternative. As such, the article is relevant and represents an interesting follow-on paper of Dabas et al. (2008), which shows that the retrieved HLOS Rayleigh wind is most sensitive to the prescribed temperature and its uncertainty should be less than a few degrees. This requirement is generally met by using short-range forecasts of temperature and pressure from modern NWP models, which is confirmed in the present article.*

*An interesting aspect examined in section 4.3 is the correction of L2B HLOS winds (oper) using differences between the reference temperature from IFS and the short-range forecast temperature from ARPEGE. It is shown that this correction is generally small, but could be significant over some specific locations such as in the stratosphere, near-surface polar regions and jet streams, leading to substantial HLOS wind corrections. However, these corrections remain smaller than the estimated FM-B HLOS wind errors, which is approximately 4 m/s during the period examined. This investigation will be useful to other NWP centers that use the L2B product generated at ECMWF for their research and operational applications.*

*The authors provide many technical details about the processing of Aeolus data at Meteo-France that make the article somewhat difficult to read, especially for readers outside the NWP community. Eliminating some technical details in sections 3.1 and 3.2 would improve the manuscript. A careful revision of the English is also recommended.*

We thank reviewer for this comment. We believe that a clear description of the experiment is crucial for the reproducibility. In this paper we introduced a methodology that is not following the operational production of AUX\_MET files since we considered a different data assimilation system. We think that some details of this production must be kept in the paper for any other NWP group that would be interested in running their own L2B processing and AUX\_MET production. As well, a clear description is necessary to be able to introduce all error sources affecting the sensitivity study described afterwards. Therefore, we removed some details that are not necessary and rather add some additional explanation on error sources arising from the chosen experimental set-up. English has been revised as well.

### **Specific comments:**

**C1:** Lines 8, 10, 12 and elsewhere in the text: *It is stated that model errors for prescribed temperature and pressure are not taken into account in the estimation of HLOS winds. However, what are actually not accounted for are forecast errors, which include both model, representation and initial condition errors propagated in time. It is important to make that distinction because near-surface errors over the poles (model and representation errors) are not of the same nature of errors near jet streams (mostly from initial condition errors). This confusion between model and forecast errors should be corrected throughout the manuscript. Alternatively, this issue could be discussed in the introduction by stating that model error in this article means the sum of model, representation and initial condition errors. Another source of errors could be the difference in the forecast lead-times of IFS and ARPEGE temperature and pressure used in the AUX\_MET files (i.e. 6-h and 30-h forecasts for IFS vs 3-h to 9-h forecasts for ARPEGE).*

The confusion on errors affecting this study has been corrected over the whole text. We thank the reviewer for providing this comment since we realized that the a number of factors affecting this sensitivity study were not properly described in the previous version of the text. This has been corrected at several places: lines 41-42 introduce the most well known and expected error sources, lines 56-63 introduce errors related to the comparison of two NWP forecasts and in lines 157-164 additional error sources are described arising due to differences in data assimilation system design and forecast lead time.

**C2:** Lines 53-55 : *The reasons and limitations of using the difference between short-range forecasts from two NWP for assessing the impact of temperature and pressure uncertainties should be further discussed and justified here. In particular, the underestimation of the temperature errors due to error correlation between IFS and ARPEGE short-range forecasts.*

As mentioned for comment C1, a new paragraph has been added to address this issue (lines 56-63). The main reason for using 2 NWP forecasts is the ability to study (fairly economically) the spatial-temporal variability in forecast errors (although due to problems mentioned in lines 56-63 we have been finally forced to study zonally-averaged patterns of uncertainties) which is currently not taken into account in the operational L2B. This study was found important especially for future missions. A better experimental set-up would be to consider the forecast error information from an operational ensemble of forecasts, however, this has not been implemented.

**C3:** Line 58 : *The definition of AUX\_MET should be provided here instead of in line 98, or simply replace AUX\_MET here by the plain definition ‘auxiliary meteorological data input’.*

We agree, it is corrected.

**C4:** Line 71 : *This expression is not a linear interpolation but a first order Taylor expansion. Replacing linear interpolation by linear approximation would be fine.*

We agree, it has been changed.

**C5:** Line 129 : *AUX\_METoper* are the met data generated from the IFS short-range forecasts. Hence, it would be easier for the reader to replace *AUX\_METoper* by *AUX\_METifs* or *AUX\_METecmwf*.

We agree. It has been corrected as well in Fig. 2.

**C6:** Line 209 : Is it 89 km or 87 km as usually reported many Aeolus studies?

This has been corrected to the value that is reported by *Martin et al.*, *Validation of Aeolus winds using radiosonde observations and numerical weather prediction model equivalents*, *Atmos. Meas. Tech.*, 14, 2167–2183, <https://doi.org/10.5194/amt-14-2167-2021>, 2021.

**C7:** Lines 212-214 : Do you also consider a background check quality control?

We thank the reviewer for making a comment on this, we forgot to add it in the first version of the text. It has been corrected.

**C8:** Lines 262-264 : It should be mentioned that the temperature difference between IFS and ARPEGE are expected to be smaller than the real temperature uncertainty because of the similarities between the two forecast systems.

We agree. This has been modified in the revised text (lines 56-63).

**C9:** Line 284 : I suggest inverting Fig. 7 and Fig.6 to make these figures appearing in the right order in the text.

We agree with this suggestion that improves the readability.

**C10:** Lines 289-290 : It is hard to say that the granulation is due to model error because the truth is unknown. What we see here is the difference between two background fields.

We agree this has been modified.

**C11:** Line 358 : ‘Regarding the results presented further this has been found insignificant’. This sentence is not clear.

We agree that this sentence has been poorly written. The idea is that the difference is so small that it is not relevant for the remaining of the study. This is corrected in revised text.

**C12:** Line 399 : Could also be due to differences between the IFS and ARPEGE data assimilation systems.

We agree with this possibility. We changed the text accordingly.

**C13:** *Lines 400-401 : This comparison between the short-range forecast differences and the EDA spread should be discussed earlier in the text (e.g. lines 262-264). This is an important element to justify the use of temperature differences between the IFS and ARPEGE forecasts as a proxy for reference temperature errors.*

We agree with the suggestion. The corresponding discussion has rather been moved in section 4.2 (lines 304-309), that introduces temperature and pressure differences.
